# Supplementary material for: Blood mercury, lead, cadmium, manganese and selenium levels in pregnant women and their determinants: the Japan Environment and Children’s Study (JECS)
Source: PubMed Central journal article supplement (PMC6760604; doi:10.1038/s41370-019-0139-0), 2019-04-18
Supplement: 41370_2019_139_MOESM12_ESM.pdf [file 41370_2019_139_MOESM12_ESM.pdf]

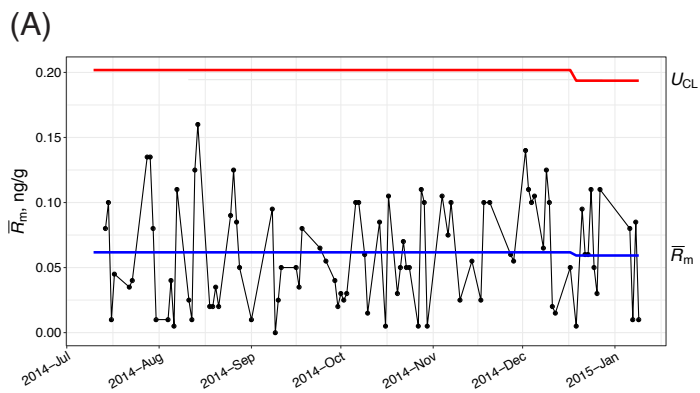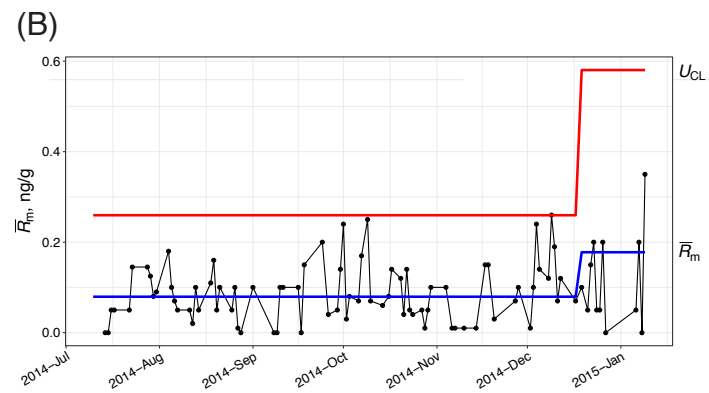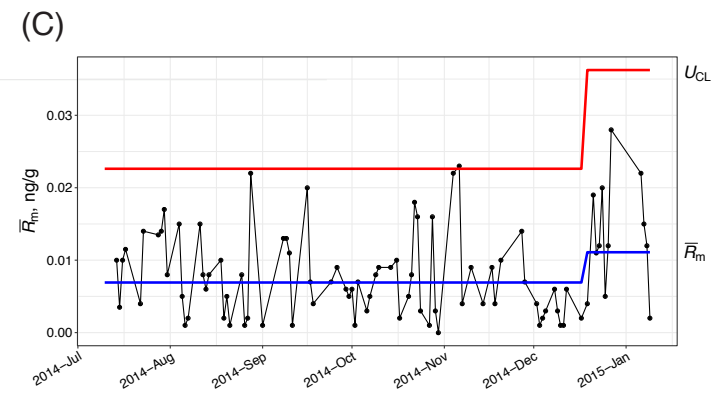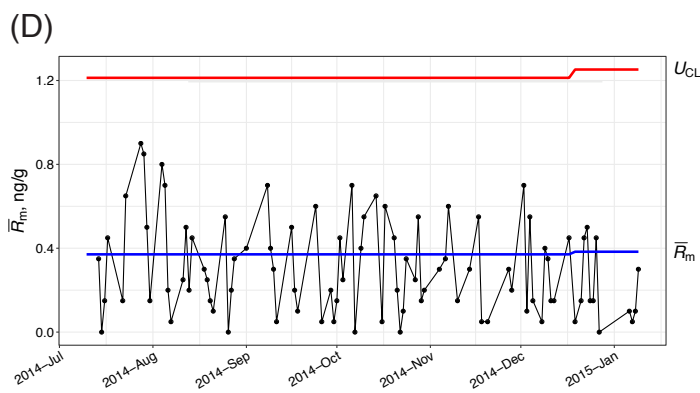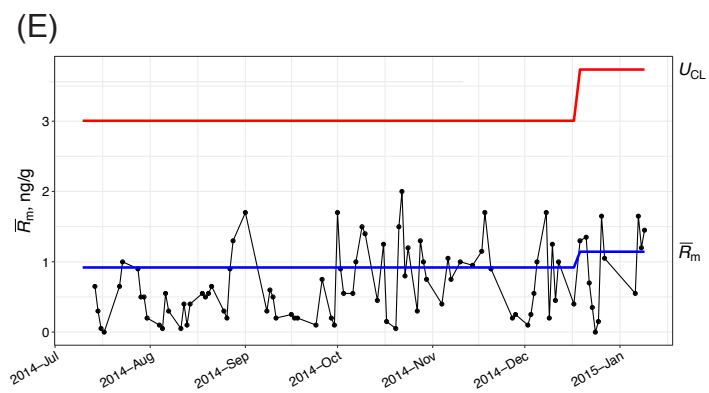

Figure S4
